# Supplementary material for: Unravelling the properties of supported copper oxide: can the particle size induce acidic behaviour?
Source: Royal Society of Chemistry journal article supplement (doi:10.1039/c2dt32454g), 2012-11-09
Supplement: c2dt32454g.pdf [file c2dt32454g.pdf]

## Supporting material

### Unravelling the properties of supported copper oxide: can the particle size induce acidic behaviour?

Federica Zaccheria <sup>a</sup>, Nicola Scotti <sup>a</sup>, Marcello Marelli <sup>a</sup>, Rinaldo Psaro <sup>a</sup> and Nicoletta Ravasio <sup>a\*</sup>

<sup>‡</sup>CNR, Istituto di Scienze e Tecnologie Molecolari, Via Golgi 19, 20133 Milano, Italy

#### AUTHOR INFORMATION

Corresponding Author

\* n.ravasio@istm.cnr.it

## Experimental details

### *Materials*

The dispersed copper catalyst, obtained by Chemisorption-Hydrolysis technique (CH) with 12% by weight of copper loading was prepared by adding silica ( $\text{SiO}_2$ , SSA =  $480 \text{ m}^2/\text{g}$ ; PV =  $0.75 \text{ mL/g}$ ) to a  $1.3 \text{ M } [\text{Cu}(\text{NH}_3)_4]^{2+}$  solution. Typically 2.5 mL of solution per gram of silica were used.

After 20 min under stirring the mixture was transferred in a flask and slowly diluted with water by keeping the reactor at  $0^\circ\text{C}$ . After the hydrolysis step the suspension was filtered off and the solid obtained was dehydrated overnight in oven at  $120^\circ\text{C}$  and then calcined at  $350^\circ\text{C}$  for 4 hours in air.

The Incipient Wetness (IW) sample was prepared by impregnating the support with a copper nitrate solution of proper concentration and volume in order to obtain a 12% loaded catalyst over the same silica as the support.

### *TPR analysis*

TPR analysis was performed with a modified version of the Micromeritics Pulse Chemisorb 2700 apparatus. Catalysts (25 mg) were diluted with a proper amount of quartz in order to have the same copper concentration), calcined at  $500^\circ\text{C}$  under  $\text{O}_2$  (40 mL/min), and then reduced at  $8^\circ\text{C}/\text{min}$  under a flow (15 mL/min) of a 8%  $\text{H}_2/\text{Ar}$  mixture.

The experimental conditions (heating rate, gas concentration) were the same for all the sample

### *FT-IR of adsorbed Pyridine*

FTIR of adsorbed pyridine (Py) were registered on catalysts pellets (15-20 mg) using a home made glass chamber with  $\text{CaF}_2$  windows and a Biorad FTS-40 FTIR spectrophotometer. Prior to Py adsorption, the samples were pretreated by dehydration at  $270^\circ\text{C}$  (20 min in air + 20 min under vacuum) and then cooled down to RT.

After this pretreatment, they were exposed to Py vapors for 15 min and infrared spectra were recorded at RT after out-gassing for 30 min at RT, 50, 100, 150, 200 and  $250^\circ\text{C}$ , respectively.

A comparison experiment was carried out on a not-pretreated sample of 12CuO/Si CH, showing results comparable to those reported for the pretreated one (See Figure S1 vs Figure 6)

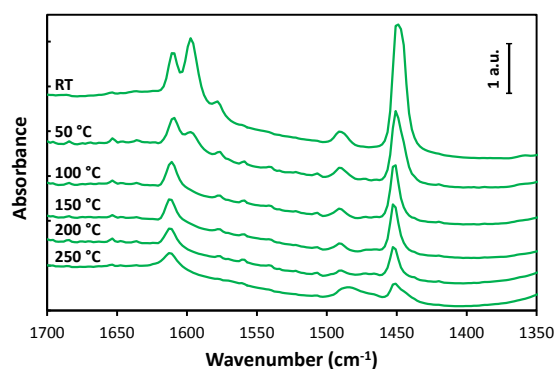

**Figure S1**

Py adsorption patterns at different desorption temperature for **not pretreated** 12CuO/Si CH: a) RT; b) 50 °C; c) 100 °C; d) 150 °C; e) 200 °C; f) 250 °C

### ***HRTEM analysis***

The morphology and distribution of the supported metal particles were evaluated by HRTEM. The powder samples were further ground and dispersed in isopropyl alcohol in an ultrasonic bath. A drop of the suspension was deposited on a perforated carbon film supported on a copper TEM grid. The specimen, after solvent evaporation overnight, was inserted in the column of a ZEISS LIBRA200FE HRTEM. Micrographs were taken spanning wide regions of several support grains in order to provide a truly representative map of the catalyst system. Specimens were stable during the measurements under the TEM operating conditions. Distribution histograms of metal particle fraction versus diameter were evaluated up to 350 counts per sample.

### ***DRUV analysis***

Diffuse reflectance UV–Vis (DRUV-Vis) analysis: spectra of carefully ground powders were measured on a Thermo Scientific spectrophotometer (Evolution 600), which was equipped with a diffuse reflectance accessory Praying–Mantis sampling kit (Harrick Scientific Products, USA). A Spectralon® disk was used as reference material for background measurement. All the samples were measured under ambient conditions.

### ***XRD analysis***

X-ray powder diffraction patterns were recorded within the range of  $10^\circ$  to  $70^\circ$   $2\theta$ , with a step of  $0.02^\circ$   $2\theta$  and counting time 1 or 4 sec/step on Philips PW-3020 powder diffractometer Ni-filtered Cu  $K\alpha$  radiation. The peak of CuO (111) at  $2\theta=35.5^\circ$  was used for line-broadening determinations. Copper oxide crystallite sizes were estimated using the Scherrer equation.
